## **Aerosolization of *Mycobacterium tuberculosis* by tidal breathing**

(Short title: Tidal breathing generates tuberculosis bioaerosols)

Ryan Dinkele,<sup>1,2</sup> Sophia Gessner,<sup>1,2</sup> Andrea McKerry,<sup>3</sup> Bryan Leonard,<sup>3</sup> Juane Leukes,<sup>3</sup> Ronnett Seldon,<sup>3</sup> Digby F. Warner,<sup>1,2,4\*</sup> and Robin Wood<sup>2,3\*</sup>

<sup>1</sup>SAMRC/NHLS/UCT Molecular Mycobacteriology Research Unit & DST/NRF Centre of Excellence for Biomedical TB Research, Department of Pathology, Faculty of Health Sciences, University of Cape Town, South Africa.

<sup>2</sup>Institute of Infectious Disease and Molecular Medicine, Faculty of Health Sciences, University of Cape Town, South Africa.

<sup>3</sup>Desmond Tutu Health Foundation, University of Cape Town, South Africa.

<sup>4</sup>Wellcome Centre for Infectious Disease Research in Africa, Faculty of Health Sciences, University of Cape Town, South Africa.

\*Corresponding authors:

Robin Wood: [robin.wood@hiv-research.org.za](mailto:robin.wood@hiv-research.org.za), +27 21 650 6966; Digby Warner:

[digby.warner@uct.ac.za](mailto:digby.warner@uct.ac.za), +27 21 406 6556.

## 1 **Abstract**

2 **Rationale:** Interrupting tuberculosis (TB) transmission requires an improved  
3 understanding of how – and when – the causative organism, *Mycobacterium*  
4 *tuberculosis* (*Mtb*), is aerosolized. Although Cough is commonly assumed to be the  
5 dominant source of *Mtb* aerosols, recent evidence of Cough-independent *Mtb* release  
6 implies the contribution of alternative mechanisms.

7 **Objective:** To compare the aerosolization of *Mtb* and particulate matter from  
8 GeneXpert-positive patients during three separate respiratory manoeuvres: Tidal  
9 Breathing (TiBr), Forced Vital Capacity (FVC), and Cough.

10 **Methodology:** Bioaerosol sampling and *Mtb* detection were combined with real-time  
11 assessments of CO<sub>2</sub> production and particle counts from 39 confirmed TB patients.

12 **Measurements and Main Results:** TiBr and FVC produced comparable numbers of  
13 particles, with Cough producing >4-fold more. For all manoeuvres, the proportions of  
14 particles detected across size categories from 0.5 – 5 µm were similar, with minor  
15 differences observed only in particles between 1.5 – 2 µm ( $p = 0.014$ ) and >5 µm ( $p =$   
16  $0.020$ ). Viable *Mtb* bacilli were detected in 66%, 70%, and 65% of TiBr, FVC, and  
17 Cough samples, respectively. Notably, while Cough produced 3-fold more *Mtb* than  
18 TiBr, the relative infrequency of coughing compared to breathing implies that TiBr likely  
19 contributes >90% of the daily aerosolised *Mtb* across a range of Cough frequencies.

20 **Conclusions:** Our results suggest that, while Cough increases particle aerosolization  
21 compared to TiBr, this is not associated with increased *Mtb* aerosolization. Instead,  
22 TiBr produces more *Mtb* per particle than Cough. Assuming the number of viable *Mtb*  
23 organisms detected provides a proxy measure of patient infectiousness, these  
24 observations imply a significant contribution of TiBr to TB transmission.

25 **Key words:** TB transmission, bioaerosol, cough, forced vital capacity.

26  
27  
28  
29

30

## 31 **Introduction**

32 Chronic Cough is a hallmark symptom of tuberculosis (TB), an airborne infectious  
33 disease which is caused by *Mycobacterium tuberculosis* (*Mtb*) and is associated with  
34 high global mortality and morbidity (1). Given its importance in TB diagnosis, Cough  
35 has unsurprisingly been central to TB transmission research (2). There are multiple  
36 lines of evidence, however, which suggest that the focus on Cough risks ignoring other  
37 important contributing mechanisms, undermining the implementation of new  
38 approaches to reducing TB transmission – especially in TB endemic settings. For  
39 example, a recent national TB prevalence survey in South Africa (consistently among  
40 the WHO's annual list of high TB burden countries) reported that nearly 60% of  
41 individuals with bacteriologically confirmed pulmonary TB were asymptomatic (3).  
42 Similarly, a pioneering face-mask sampling study noted no association between  
43 Cough frequency and the detection of *Mtb* organisms (4). When considered with  
44 modelling data which estimate 1.7 billion latent *Mtb* infections globally (5), these  
45 observations imply that most *Mtb* infections are not associated with Cough as  
46 pathognomonic symptom – even when *Mtb* bacilli are present at detectable levels (3).  
47 Given the low proportion of infections leading to symptomatic disease and the scale  
48 of the TB epidemic, it is conceivable that *Mtb* transmission from symptomatic  
49 individuals, and therefore Cough, is highly efficient. However, considering the  
50 challenges in identifying TB transmitters (6) and the lack of association between *Mtb*  
51 detection and Cough frequency (4), an alternative must be considered: is TB  
52 transmission primarily accomplished by Cough-independent means?

53 We have developed a platform combining non-invasive bioaerosol capture  
54 technology and fluorescence microscopy to enumerate viable *Mtb* released by  
55 confirmed TB patients (7-9). Using this platform, we detected *Mtb* bacilli in the absence  
56 of (induced) Cough. More recently, we compared deep exhalations to Cough and  
57 found no difference in *Mtb* aerosolization (10). However, these observations were not  
58 conclusive given that we did not directly investigate the propensity for respiratory  
59 aerosol production in each manoeuvre. Therefore, we aimed in the current work to  
60 investigate the potential for *Mtb* release via Tidal Breathing (TiBr), Forced Vital  
61 Capacity (FVC) and Cough. As detailed below, our observations suggest that release

62 of *Mtb* aerosols via TiBr might constitute an important contributor to ongoing  
63 transmission in both active TB disease and asymptomatic *Mtb* infection.

## 64 **Methods and materials**

### 65 *Participant recruitment*

66 Participants over 13 years of age returning a GeneXpert-positive sputum result were  
67 recruited from March 2020 to June 2021 at primary healthcare facilities in Ocean View  
68 and Masiphumelele, peri-urban townships in Cape Town, South Africa. Recruitment  
69 and sampling occurred prior to the initiation of standard anti-TB chemotherapy. Ethical  
70 approval was obtained from the Human Research Ethics Committee of the University  
71 of Cape Town (HREC 529/2019).

### 72 *Sample collection*

73 Bioaerosols from three respiratory manoeuvres, Forced Vital Capacity (FVC), Tidal  
74 Breathing (TiBr), and Cough, were captured in liquid cyclone collectors utilising a direct  
75 sampling strategy (Figure 1A) (10). A unidirectional airflow forced exhaled air via a  
76 CO<sub>2</sub> monitor and a high-flow cyclone collector at a maximum flow rate of 300 L/minute,  
77 trapping particulate matter in the collection medium (sterilised phosphate-buffered  
78 saline, PBS). During TiBr sampling, each participant placed their head within the  
79 elliptical cone and breathed normally for five minutes. Bioaerosols were captured  
80 within the cyclone collector at 200 L/minute, while 100 L/minute of exhaled air was  
81 diverted to an aerodynamic particle sizer (APS). During FVC and Cough sampling,  
82 each participant performed 15 manoeuvres by placing their head in the elliptical cone  
83 every 15 seconds. Bioaerosols were captured within the cyclone collector at 300  
84 L/minute for the first and last five manoeuvres. During the middle five manoeuvres,  
85 100 L/minute of exhaled air was diverted via the APS. New cyclone collectors were  
86 attached after each sample allowing for the independent enumeration of *Mtb* utilising  
87 our previously described concentration and visualisation pipeline (8).

### 88 *Staining and visualisation of bioaerosol samples*

89 Bioaerosols were stained with DMN-trehalose (DMN-tre) (Olilux Biosciences Inc.) and  
90 visualised as previously outlined (8). Briefly, liquid-captured bioaerosols (5 – 10 mL)  
91 were centrifuged for 10 minutes at 3000 x *g* (Allegra X-15R, Beckman Coulter) and  
92 resuspended in 200 µL of Middlebrook 7H9 medium supplemented with 100 µM DMN-

93 tre. Staining was done overnight, after which samples were concentrated at 13,000 x  
94 g for five minutes and resuspended in 20  $\mu$ L filtered PBS. Stained samples were  
95 loaded on nanowell-arrayed microscope slides and viewed on a Zeiss Axio Observer  
96 7 with widefield illumination from a 475 nm LED and a Zeiss 38 HE filter set. A 100x  
97 plan-apochromatic phase 3 oil immersion objective (NA = 1.4) was used.

## 98 *Statistical methods*

99 Each participant performed three respiratory manoeuvres violating the assumption of  
100 independence. Therefore, to account for this correlation within the data, various Linear  
101 Mixed Models were used as the incorporation of the random effect enabled the  
102 average differences between manoeuvres to be determined while accounting for  
103 variation between participants. For continuous outcomes, a log<sub>10</sub>-transformation was  
104 performed and linearity, normality of residuals, and homoskedasticity assessed. For  
105 binary outcomes, logistic regression was performed with sample type as the fixed  
106 effect, and variation in slope (random effects) accounted for by participant. For count  
107 data, negative binomial regression was applied. Detailed statistical and data wrangling  
108 methods can be found in the online supplement. Data were analysed in R studio (11)  
109 with R version 4.0.3 (12).

## 110 **Results**

### 111 *Detection and quantification of particle release during different respiratory* 112 *manoeuvres*

113 Direct bioaerosol sampling was performed on 39 participants with corresponding CO<sub>2</sub>  
114 and particle data obtained for 32 and 33 participants, respectively; this ensured a final  
115 sample size of 32 (Figure E1). FVC and Cough samples were excluded if fewer than  
116 two peaks in particle counts were detected above background. Owing to variations in  
117 sampling duration, samples were assessed in three ways (Figure 1B): the total number  
118 or volume of particles collected, the average number or volume of particles produced  
119 per manoeuvre, and the estimated total number or volume of particles produced.

120 During the particle sampling window, similar numbers (Figure 2A) and volumes  
121 (Figure E2A) of particles were collected for TiBr and Cough, with FVC producing  
122 significantly fewer particles than TiBr. However, after averaging the number of  
123 particles per manoeuvre, it was clear that TiBr produced a significantly lower number

124 (Figure 2B) and volume (Figure E2B) of particles compared to either FVC or Cough.  
125 Interestingly, when considering the total number of manoeuvres performed, TiBr and  
126 FVC produced comparable numbers (Figure 2C) and volumes (Figure E2C) of  
127 particles, with Cough producing more than 4-fold more particles than TiBr. Inter-  
128 participant variability contributed approximately 12% of the total variation when  
129 examining particle numbers per manoeuvre (Figure 2B), and approximately 16% of  
130 the variation when examining particle volumes per manoeuvre (Figure E2B). Together,  
131 these data suggest that variation in particle production between the three respiratory  
132 manoeuvres contributed to variation in the overall volume of bioaerosol collected after  
133 5 minutes of sampling; however, no manoeuvre was significantly under-sampled.

134 *Size stratification of particles enables more specific comparisons of respiratory*  
135 *manoeuvres*

136 Particles of various sizes are aerosolised and may differ between respiratory  
137 manoeuvres. The APS binned particles into size categories (Figure 3A); therefore, we  
138 examined the effect of each manoeuvre on the distributions of particles across  
139 categories. The average number (Figure 3B) and volume (Figure E3A) of particles per  
140 manoeuvre were stratified by size category and sample type, with the individual data  
141 from each participant overlaid. Two features were apparent: firstly, there was a  
142 consistent distribution in average count per size category across all three manoeuvres.  
143 Moreover, this trend was recapitulated when the proportion of each size category  
144 relative to the total particle count per manoeuvre was compared for each size category  
145 (Figure 3C). Only minor variations were detected, with levels of significance reached  
146 solely for C.3 (1.5 – 2  $\mu\text{m}$ ) and C.5 (>5  $\mu\text{m}$ ). This suggested that factors leading to  
147 increased bioaerosol generation did not affect the distribution of size categories  
148 aerosolised over the size range measured. The second striking observation was the  
149 per patient consistency in the relationship between the different size categories. It was  
150 also apparent that size category was not a confounder of the relationship between the  
151 manoeuvre type and particle count per manoeuvre (Figure E3B), as the average  
152 differences between TiBr and FVC and TiBr and closely recapitulated those observed  
153 in the previous model (Figure 2B). In combination, these results indicated that intrinsic  
154 differences in the propensity for total particle production separate individuals, and that  
155 these are conserved across particle sizes.

156            *Use of three independent cyclone collectors to enable enumeration of Mtb*  
157            *bacilli*

158    The relative contributions of different respiratory manoeuvres to aerosolization of *Mtb*  
159    bacilli has been poorly studied, with most reports focusing on Cough. We implemented  
160    a sampling strategy comprising 15 FVC and Cough manoeuvres and five minutes of  
161    TiBr. This resulted in closely matching volumes of bioaerosol collected for TiBr and  
162    FVC samples, with more than 3-fold the volume collected during Cough sampling  
163    (Figure E2C). Given the increased volume of bioaerosol collected from Cough and its  
164    assumed importance in TB transmission, we expected to find the greatest numbers of  
165    *Mtb* bacilli in the Cough samples.

166            The rate of production of *Mtb* was estimated for the three manoeuvres during  
167    the five minutes of sampling. For both FVC (IRR = 0.53,  $p = 0.0971$ ) and Cough (IRR  
168    = 0.51,  $p = 0.0662$ ), there was a trend to *Mtb* production at a lower rate compared to  
169    TiBr; however, neither of these was statistically significant (Figure 4A). Surprisingly,  
170    the percent of positive samples was consistent for all three manoeuvres, with 66%,  
171    70%, and 65% of the samples positive for *Mtb* in TiBr, FVC, and Cough, respectively.  
172    Additionally, no significant differences were detected in the odds ratio of detecting *Mtb*  
173    between TiBr and FVC or TiBr and Cough (Figure 4B).

174            The occurrence of spontaneous coughs during TiBr sampling might confound  
175    the TiBr measurement. To test this possibility, peaks detected in TiBr that were greater  
176    than 1.5 times the average peak height in the corresponding Cough sample were  
177    assumed to be spontaneous coughs (Figure E4A, right panel). Notably, plotting *Mtb*  
178    counts from TiBr against the number of coughs detected (Figure E4B) indicated no  
179    association between the number of *Mtb* and spontaneous coughs during sampling.

180            To examine the relationship between particle numbers and the aerosolization  
181    of *Mtb* bacilli, the relative abundance of *Mtb* bacilli per particle was calculated for all  
182    three manoeuvres. Participants with a zero count for *Mtb* were excluded from this  
183    analysis. The average concentration of *Mtb* bacilli for TiBr was 70% and 90% higher  
184    than that of FVC and Cough, respectively (Figure 5A). In addition, no correlation  
185    between total *Mtb* count and total particle count was observed for either FVC or Cough  
186    (Figure 5B). A slightly more apparent linear relationship was observed for TiBr (Figure  
187    5B); however, this did not reach statistical significance. Together, these data imply a  
188    disconnect between the aerosolization of particles and *Mtb*.

189            *The extent of aerosolization of Mtb depends predominantly on manoeuvre*  
190            *frequency*

191    Knowing the concentration of *Mtb* per volume of bioaerosol suggested the potential to  
192    gain useful insight into the relative contributions of Cough and TiBr to the daily  
193    production of *Mtb*. To this end, we first compared the average number of bacilli  
194    produced per manoeuvre. On average, TiBr produced 2.6- and 3.2-fold fewer *Mtb* per  
195    manoeuvre compared to FVC and Cough, respectively (Figure 6A). Next, we  
196    extrapolated the values for the average number of bacilli per manoeuvre and the  
197    average frequency of manoeuvres per day to estimate daily *Mtb* production. Because  
198    FVCs are artificial, directed manoeuvres that are performed only under specific  
199    instruction, we utilized TiBr and Cough for this calculation.

200            Our data revealed that participant TiBr occurred at a rate of around one breath  
201    every 3.9 seconds, suggesting approximately 22,047 tidal breaths over 24 hours.  
202    Since we did not directly measure the frequency of spontaneous coughs, we estimated  
203    24-hour Cough frequencies from published data (4), with a median of 466 coughs/day  
204    (first quartile 234, last quartile 551). We then used a constant maximum number of  
205    breaths per day (22,047) and assumed that, for each Cough, there would be one fewer  
206    breath. The average number of *Mtb* bacilli produced by TiBr and Cough was then  
207    calculated, and the relative proportion determined by dividing the number per  
208    manoeuvre by the total. This enabled an estimation of the relative contribution per day  
209    for an average person with an increasing number of coughs (Figure 6B).

210            It was apparent that Cough contributed between 3 and 7% of the total number  
211    of *Mtb* bacilli released, with TiBr consistently producing over 93%. Together, these  
212    data suggest that coughing is likely to produce significantly fewer bacilli per day  
213    compared to TiBr. That is, while the higher per event number and velocity of bacillary  
214    release might ensure an important role for coughing in disease transmission in short  
215    contacts, for typical exposures in high-risk settings such as public transport,  
216    workplaces, schools, *etc.* (13), TiBr is expected to contribute significantly to TB  
217    prevalence, especially in high-burden settings such as South Africa.

218    **Discussion**

219    Cough has traditionally been considered the primary means of TB transmission (14).  
220    The result is that TB transmission research has predominately focused on factors



221 including Cough production, frequency, and the Cough-borne *Mtb* bacillary load (2).  
222 However, the absence in all studies of a comparator respiratory manoeuvre (15-17)  
223 has rendered impossible any assessment of alternative contributory mechanisms.  
224 Transmission by aerosol requires the aerosolization of particles from the site of  
225 infection (18). For *Mtb*, which infects the peripheral lung and alveolar spaces (19), the  
226 proposed mechanism of particle aerosolization is fluid film rupture (20). According to  
227 this model, particles are produced during inspiration by alveolar reopening and  
228 released through expiration (21). Factors impacting particle release are therefore the  
229 rate of inspiration and the depth of expiration (21), with a recent study comparing deep  
230 exhalation and Cough finding no significant difference in the number of *Mtb*  
231 aerosolized between the two manoeuvres (10). For these reasons, we hypothesized  
232 that TiBr contributes to the aerosolization of *Mtb*. Therefore, we sought in this study to  
233 directly compare the propensity for particle and *Mtb* aerosolization via three defined  
234 respiratory manoeuvres: Cough, FVC and TiBr.

235 We sampled bioaerosols from 39 TB-positive participants. Consistent with  
236 findings from similar studies, 88% of participants produced at least one bioaerosol  
237 sample that was positive for *Mtb* (4, 8, 10), a marked increase over culture-based  
238 Cough-sampling techniques (17). Our results also indicated that all three respiratory  
239 manoeuvres were equally likely to produce *Mtb*, with TiBr, FVC, and Cough returning  
240 positive signals in 66%, 70%, and 65% of samples, respectively. When extrapolating  
241 based on daily manoeuvre frequency, these observations imply that TiBr contributes  
242 more than 90% of the daily aerosolised *Mtb* across a range of Cough frequencies – a  
243 conclusion consistent with the lack of correlation between *Mtb* aerosolization and  
244 Cough frequency (4).

245 Establishing a sampling algorithm appropriate for three distinct respiratory  
246 manoeuvres is challenging. However, the total number of particles produced during  
247 FVC and TiBr sampling were similar, with the Cough producing approximately 4-fold  
248 more particles. This suggested that, despite differences in sampling algorithms, the  
249 risk of under-sampling any manoeuvre was low. In addition, we saw significant  
250 variation between participants, spanning two orders of magnitude, consistent with  
251 previous observations (22). Per manoeuvre, TiBr produced significantly fewer particles  
252 than both FVC and Cough, with Cough producing the most particles. While it is  
253 tempting to speculate that the turbulence of the expired air played a role in the

254 increased number of particles produced by Cough, this interpretation seems unlikely  
255 given the similarity in particle counts for Cough and FVC. Considering Cough and FVC  
256 are quite different in the rate of expiration, it might be more instructive that both these  
257 manoeuvres require deep inspiration: the inference, then, that the rate of expiration –  
258 and, therefore, the turbulence of expired air – plays a minimal role in aerosol  
259 generation is consistent with a fluid-film rupture model of aerosol generation in the  
260 peripheral lung (21). This is also consistent with the similarities in size distributions of  
261 particles between both participants and respiratory manoeuvres. Although the  
262 absolute counts per category varied between manoeuvres, the proportional  
263 compositions within each size category were conserved – an observation which  
264 supports the inference that the mechanism of particle production is consistent across  
265 the three respiratory manoeuvres (21, 22).

266 The average total number of *Mtb* per participant was 12.6 (max = 52),  
267 consistent with our previous study (8). However, owing to continued enhancements of  
268 our bioaerosol collection system, participants were sampled for ~15 minutes in this  
269 study *versus* the 60-minute sampling duration reported previously (8). Unexpectedly,  
270 all three respiratory manoeuvres produced consistently low levels of *Mtb*, with a mean  
271 count of 3.9 (max = 21), 5.9 (max = 39) and 3.4 (max = 15) for FVC, TiBr and Cough,  
272 respectively. TiBr samples tended to have a two-fold higher rate of *Mtb* aerosolization  
273 compared to both FVC and Cough; however, these differences were not significant.  
274 And, as noted above, the probability of a sample returning a positive result was  
275 consistent for all respiratory manoeuvres. Notably, among the participants who  
276 generated at least one positive sample, most (27/28) produced *Mtb* within their FVC  
277 and/or TiBr sample. These findings suggest that induced Cough may be unnecessary  
278 in studying *Mtb* transmission, a potentially important innovation given the strenuous  
279 nature of the induced Cough especially for unwell patients.

280 Contrary to our expectations, the concentration of *Mtb* bacilli per particle was  
281 70% or 90% lower in FVC and Cough, respectively, compared to TiBr. In addition, no  
282 correlation was observed between particle number and *Mtb* count, even when  
283 stratified by participant. Together, these data suggest that variation in particle  
284 production alone is insufficient evidence to identify infectious patients, and that  
285 applications to reduce particle production seem unlikely to reduce infectiousness (23).

286           Despite the apparent unlinking of particle count and *Mtb* aerosolization, the  
287 sizeable increase in aerosol production during FVC and Cough manifest as a 3-fold  
288 increase in *Mtb* aerosolization for these manoeuvres compared to TiBr. However,  
289 when extrapolated to daily estimates, the relatively high frequency of breathing relative  
290 to coughing suggests that, over time, TiBr represents a major source of *Mtb* aerosols,  
291 as suggested previously (20). We calculated that, during any single day, breathing  
292 contributes >90% of the *Mtb* aerosolised by a TB-positive individual.

293           Our study had a number of limitations. The sample collection algorithm was not  
294 consistent for all respiratory manoeuvres – TiBr samples were primarily defined by  
295 time *versus* FVC and Cough that were defined by event number – and the particle  
296 collection and measurement apparatus were connected in parallel and not in series.  
297 Consequently, extrapolations were required to estimate the total number of particles  
298 and organisms present in the entire bioaerosol. Additionally, no work was done to  
299 determine the effect of manoeuvre order on particle or *Mtb* production. This could have  
300 impacted particle and *Mtb* production through participant exhaustion or through  
301 particle clearance. That said, we did separate FVC and Cough samples to ensure that  
302 TiBr provided a rest period between strenuous samples. The participants included in  
303 this study were diagnosed TB-positive via GeneXpert. Therefore, we cannot conclude  
304 the relative importance of TiBr to asymptomatic transmission. While our data indicate  
305 that significant levels of *Mtb* are aerosolised daily independent of participant Cough,  
306 further work is required to investigate this hypothesis in GeneXpert-negative,  
307 asymptomatic individuals. Owing to technical challenges inherent in studying  
308 spontaneous Cough over short sampling periods, we only studied induced Cough  
309 which may not be as infectious. Nevertheless, spontaneous coughs were detected in  
310 several TiBr samples, with no effect on overall production of *Mtb*. In estimating Cough  
311 frequency per hour, we assumed that the rate is consistent throughout the day. This  
312 is a strong assumption, and it is more likely that coughs cluster into discrete events  
313 with multiple coughs occurring at a time, suggesting potential outbursts of infectious  
314 aerosol production. A final limitation is that, while it might reasonably be assumed that  
315 *Mtb* bioaerosol counts are directly linked to infectiousness, this has not been formally  
316 demonstrated.

317           Despite these limitations, we interpret our results as indicating that TiBr might  
318 be a significant contributor to *Mtb* transmission in an endemic TB setting. This has

319 significant ramifications for both transmission studies and intervention strategies.  
320 Firstly, bioaerosol sampling lends itself to a non-invasive participant sampling.  
321 Although the impact of induced Cough on a participant is relatively low, if a less  
322 invasive sampling algorithm can be applied, it should be. Secondly, interventions  
323 targeting disease transmission, such as active screening for symptomatic individuals,  
324 may not be effective. Therefore, linking bioaerosol organisms with infectious potential  
325 is of vital importance. Bioaerosol sampling is non-invasive and provides potential to  
326 identify infectious individuals well in advance of any typical screening regimen. This  
327 may offer a novel means to identify and treat infectious individuals before they  
328 manifest with definite symptoms.

329 A paradigm in which Cough is the primary driver of TB transmission places  
330 surpassing importance on lung pathology; moreover, it appears inconsistent with key  
331 epidemiological observations. Sub-clinical TB infections could represent a novel and  
332 uncontrolled source of disease transmission. Consequently, understanding how *Mtb*  
333 bacilli are aerosolised is of critical importance to curbing the epidemic in high-burden  
334 settings

335

### 336 **Author contribution:**

337 Conceptualization and design: RD, SG, AM, BL, JL, RS, DFW & RW; acquisition of  
338 data: JL, AM, BL, RS & RW; analysis and interpretation: RD, DFW & RW; first  
339 manuscript draft: RD & DFW; funding acquisition: DFW & RW. All authors critically  
340 reviewed and revised the manuscript for intellectual content and approved it prior to  
341 submission.

### 342 **Acknowledgements**

343 We acknowledge the support of the South African Medical Research Council  
344 (SAMRC) with funds from National Treasury under its Economic Competitiveness and  
345 Support Package (MRC-RFA-UFSP-01-2013/CCAMP, RW), and the Strategic Health  
346 Innovations Partnerships (SHIP) Unit of the SAMRC (DFW) and as a sub-grant from  
347 the Bill and Melinda Gates Foundation (RW). We are grateful to the Bill & Melinda  
348 Gates Foundation (OPP1116641, RW), the US National Institutes of Health (NIH -  
349 R37AI058736, Freedberg PI; RW), the Research Council of Norway (R&D Project

350 261669 “Reversing antimicrobial resistance”, DFW), and the US National Institute of  
351 Child Health and Human Development (NICHD) U01HD085531 (DFW).

## 352 **References**

- 353 1. WHO. Global tuberculosis report 2020. 2020.
- 354 2. Donald PR, Diacon AH, Lange C, Demers AM, von Groote-Biddlingmeier F,  
355 Nardell E. Droplets, dust and guinea pigs: an historical review of tuberculosis  
356 transmission research, 1878 -1940. *Int J Tuberc Lung Dis* 2018; 22: 972-982.
- 357 3. Van der Walt M, Moyo S. The First National TB Prevalence Survey, South Africa  
358 2018: Short report. 2021.
- 359 4. Williams CM, Abdulwhhab M, Birring SS, De Kock E, Garton NJ, Townsend E,  
360 Pareek M, Al-Taie A, Pan J, Ganatra R, Stoltz AC, Haldar P, Barer MR.  
361 Exhaled *Mycobacterium tuberculosis* output and detection of subclinical  
362 disease by face-mask sampling: prospective observational studies. *The*  
363 *Lancet Infectious Diseases* 2020; 20: 607-617.
- 364 5. Houben RMGJ, Dodd PJ. The Global Burden of Latent Tuberculosis Infection: A  
365 Re-estimation Using Mathematical Modelling. *PLOS Medicine* 2016; 13:  
366 e1002152.
- 367 6. Auld SC, Kasmar AG, Dowdy DW, Mathema B, Gandhi NR, Churchyard GJ,  
368 Rustomjee R, Shah NS. Research Roadmap for Tuberculosis Transmission  
369 Science: Where Do We Go From Here and How Will We Know When We're  
370 There? *The Journal of Infectious Diseases* 2017; 216: S662-S668.
- 371 7. Wood R, Morrow C, Barry CE, 3rd, Bryden WA, Call CJ, Hickey AJ, Rodes CE,  
372 Scriba TJ, Blackburn J, Issarow C, Mulder N, Woodward J, Moosa A, Singh V,  
373 Mizrahi V, Warner DF. Real-Time Investigation of Tuberculosis Transmission:  
374 Developing the Respiratory Aerosol Sampling Chamber (RASC). *PLoS One*  
375 2016; 11: e0146658.
- 376 8. Dinkele R, Gessner S, McKerry A, Leonard B, Seldon R, Koch AS, Morrow C,  
377 Gqada M, Kamariza M, Bertozzi CR, Smith B, McLoud C, Kamholz A, Bryden  
378 W, Call C, Kaplan G, Mizrahi V, Wood R, Warner DF. Capture and  
379 visualization of live *Mycobacterium tuberculosis* bacilli from tuberculosis  
380 patient bioaerosols. *PLOS Pathogens* 2021; 17: e1009262.
- 381 9. Patterson B, Morrow C, Singh V, Moosa A, Gqada M, Woodward J, Mizrahi V,  
382 Bryden W, Call C, Patel S, Warner D, Wood R. Detection of *Mycobacterium*

- 383           *tuberculosis* bacilli in bio-aerosols from untreated TB patients *Gates Open*  
384           *Research* 2018; 1.
- 385 10. Patterson B, Bryden W, Call C, McKerry A, Leonard B, Seldon R, Gqada M,  
386           Dinkele R, Gessner S, Warner DF, Wood R. Cough-independent production  
387           of viable *Mycobacterium tuberculosis* in bioaerosol. *Tuberculosis* 2021; 126:  
388           102038.
- 389 11. RStudioTeam. RStudio: Integrated Development Environment for R. RStudio,  
390           PBC, Boston, MA; 2020.
- 391 12. RCoreTeam. R: A language and environment for statistical computing. R  
392           Foundation for Statistical Computing, Vienna, Austria.; 2020.
- 393 13. Andrews JR, Morrow C, Walensky RP, Wood R. Integrating social contact and  
394           environmental data in evaluating tuberculosis transmission in a South African  
395           township. *J Infect Dis* 2014; 210: 597-603.
- 396 14. Esmail H, Dodd PJ, Houben RMGJ. Tuberculosis transmission during the  
397           subclinical period: could unrelated cough play a part? *The Lancet Respiratory*  
398           *Medicine* 2018; 6: 244-246.
- 399 15. Fennelly KP, Martyny JW, Fulton KE, Orme IM, Cave DM, Heifets LB. Cough-  
400           generated aerosols of *Mycobacterium tuberculosis*: a new method to study  
401           infectiousness. *Am J Respir Crit Care Med* 2004; 169: 604-609.
- 402 16. Jones-Lopez EC, Acuna-Villaorduna C, Ssebidandi M, Gaeddert M, Kubiak RW,  
403           Ayakaka I, White LF, Joloba M, Okwera A, Fennelly KP. Cough Aerosols of  
404           *Mycobacterium tuberculosis* in the Prediction of Incident Tuberculosis Disease  
405           in Household Contacts. *Clin Infect Dis* 2016; 63: 10-20.
- 406 17. Theron G, Limberis J, Venter R, Smith L, Pietersen E, Esmail A, Calligaro G, te  
407           Riele J, de Kock M, van Helden P, Gumbo T, Clark TG, Fennelly K, Warren R,  
408           Dheda K. Bacterial and host determinants of cough aerosol culture positivity  
409           in patients with drug-resistant versus drug-susceptible tuberculosis. *Nature*  
410           *Medicine* 2020; 26: 1435-1443.
- 411 18. Gralton J, Tovey E, McLaws M-L, Rawlinson WD. The role of particle size in  
412           aerosolised pathogen transmission: A review. *Journal of Infection* 2011; 62: 1-  
413           13.

- 414 19. Pai M, Behr MA, Dowdy D, Dheda K, Divangahi M, Boehme CC, Ginsberg A,  
415 Swaminathan S, Spigelman M, Getahun H, Menzies D, Raviglione M.  
416 Tuberculosis. *Nature Reviews Disease Primers* 2016; 2: 16076.
- 417 20. Patterson B, Wood R. Is cough really necessary for TB transmission?  
418 *Tuberculosis* 2019; 117: 31-35.
- 419 21. Johnson GR, Morawska L. The mechanism of breath aerosol formation. *Journal*  
420 *of Aerosol Medicine and Pulmonary Drug Delivery* 2009; 22: 229-237.
- 421 22. Haslbeck K, Schwarz K, Hohlfeld JM, Seume JR, Koch W. Submicron droplet  
422 formation in the human lung. *Journal of aerosol science* 2010; 41: 429-438.
- 423 23. Edwards DA, Man JC, Brand P, Katstra JP, Sommerer K, Stone HA, Nardell E,  
424 Scheuch G. Inhaling to mitigate exhaled bioaerosols. *Proceedings of the*  
425 *National Academy of Sciences of the United States of America* 2004; 101:  
426 17383-17388.



427 **Figures**

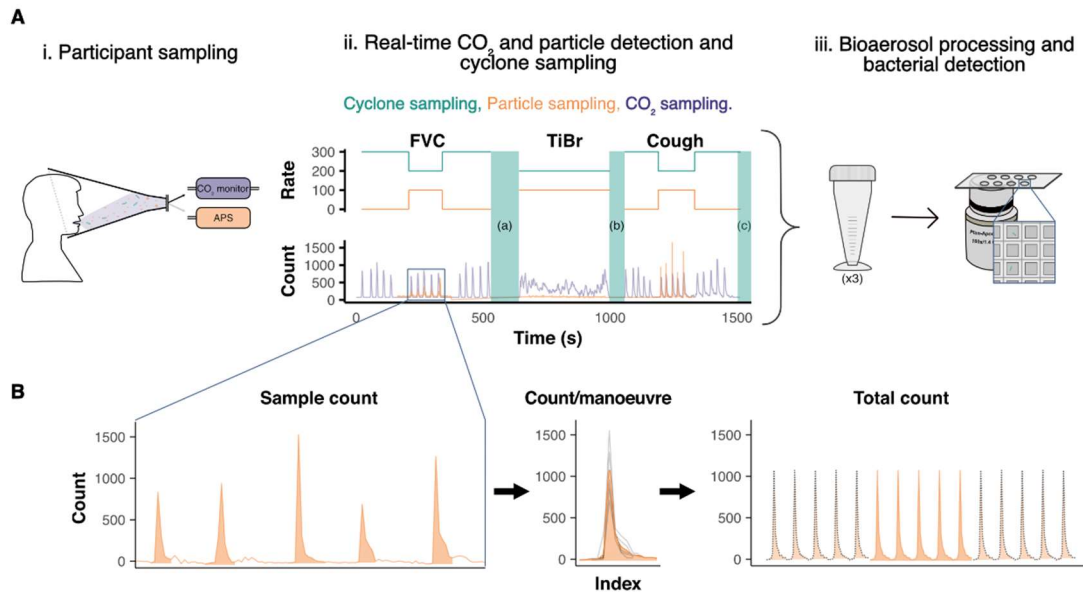

428 **Figure 1. Participant sampling strategy.** (A) i) GeneXpert-positive participants  
429 were recruited from TB clinics in Masiphumelele and Ocean View. Bioaerosol  
430 samples were collected in the RASC from three respiratory manoeuvres: Forced vital  
431 capacity (FVC), tidal breathing (TiBr) and coughing (Cough). ii) During sampling,  
432 real-time data were collected for CO<sub>2</sub> concentration (purple) and particle production  
433 (orange). Measuring particles required diverting one-third (100 L/min) of the exhaled  
434 air into an aerodynamic particle sizer (APS). Particles were only counted for one-  
435 third of FVC and Cough sampling, and for the full duration of TiBr sampling. iii) Three  
436 independent liquid cyclone collectors were attached for each manoeuvre, which were  
437 microscopically scanned for *Mycobacterium tuberculosis* (a, b and, c within the green  
438 columns, green lines indicate sample collection flow rate). (B) Graphical  
439 representation of the variables; sample count, count/manoeuvre and total count.  
440 Sample count is the total count (volume) of particles sampled.  
441 Count(volume)/manoeuvre is the average count (volume) of particles per manoeuvre  
442 during particle sampling. Total count (volume) is the estimated total number of  
443 particles per sample, calculated by multiplying the average count per manoeuvre by  
444 the total number of manoeuvres during sampling (counted utilising CO<sub>2</sub> data).

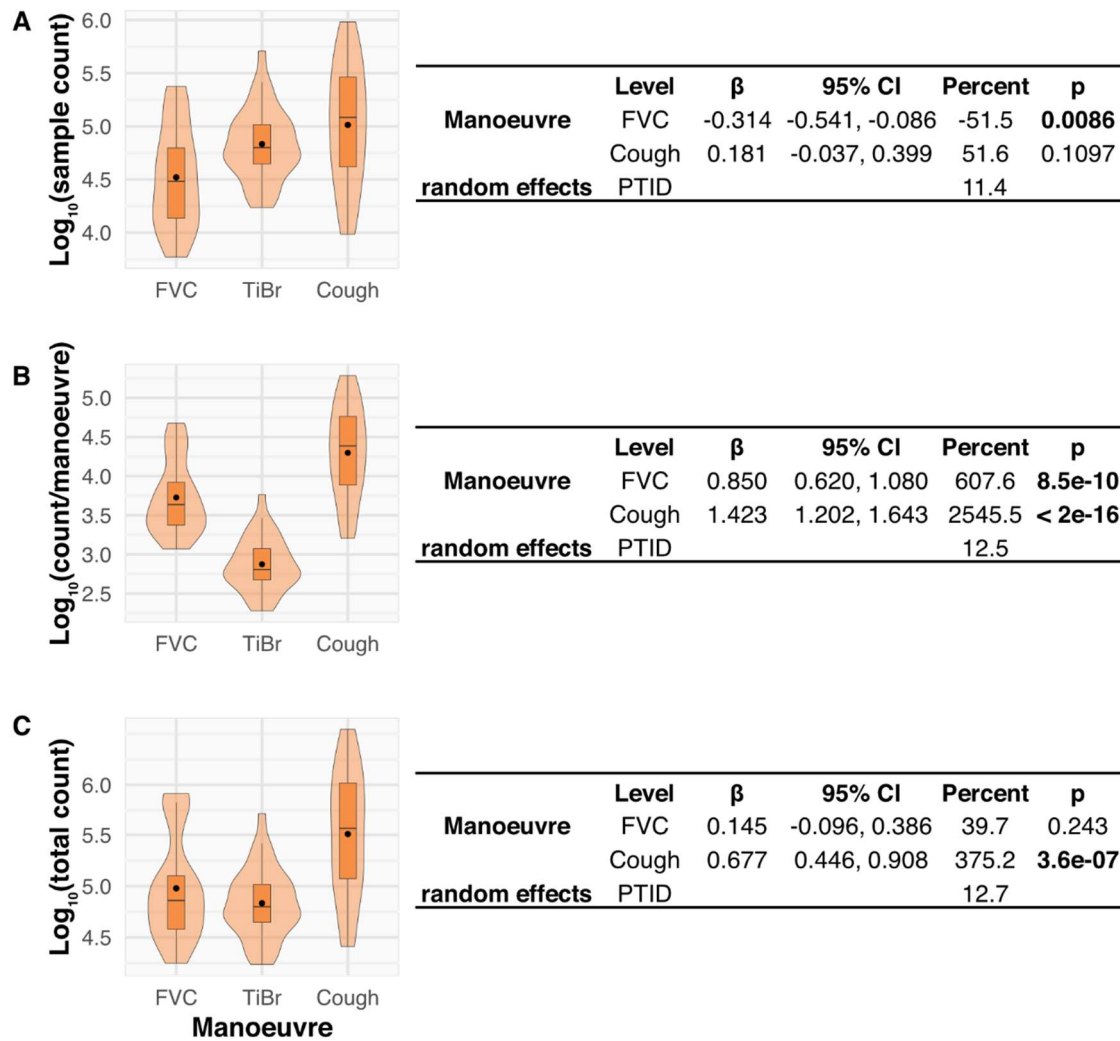

445 **Figure 2. Variation in particle production by FVC, TiBr and Cough.** A  
 446 comparison of the (A) sample count, (B) count/manoeuvre and (C) total count of  
 447 particles during sampling. The adjacent tables contain the results of univariate linear  
 448 mixed models for each. The beta-coefficient ( $\beta$ ) and 95% confidence interval (CI) are  
 449 presented with percentage change relative to TiBr (Percent). The random effects  
 450 results indicate the degree of variation (in %) between participants.

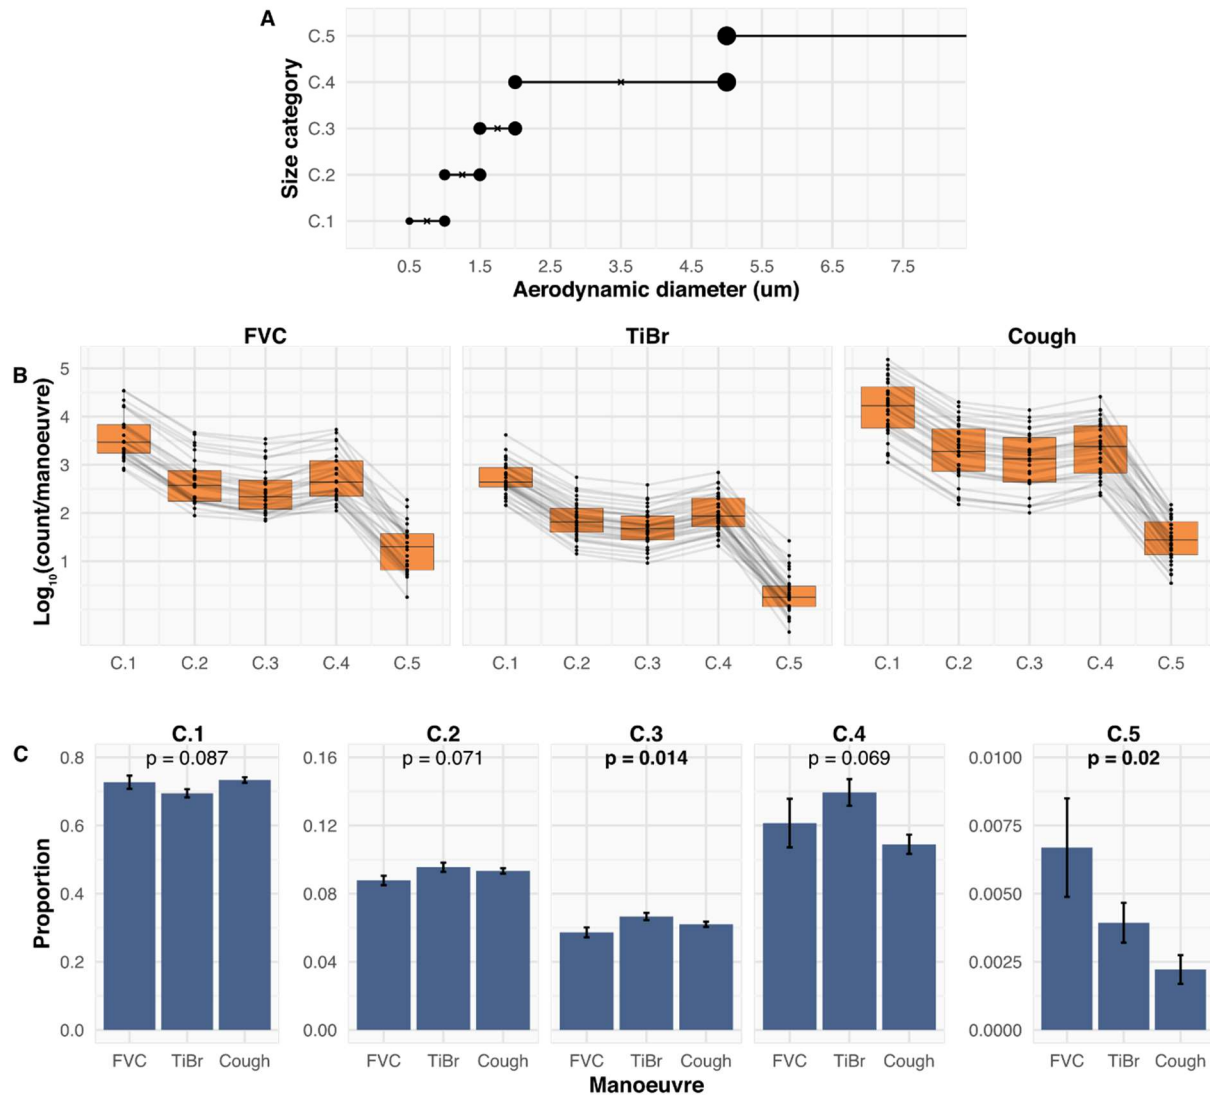

451 **Figure 3. The relative contribution of particles of various sizes is consistent**  
 452 **between FVC, TiBr and Cough.** (A) Graphical representation of the size categories  
 453 detected by the aerodynamic particle sizer. (B) A comparison of the average count  
 454 per manoeuvre stratified by size category. Grey lines indicate the average number of  
 455 particles per manoeuvre stratified by size category and participant ID (PTID). (C) A  
 456 comparison between manoeuvres of the proportion composition of each size  
 457 category per manoeuvre. The data in (C) are presented as the mean proportion  $\pm$   
 458 SEM. A Repeated Measures ANOVA was performed, p values below 0.05 are  
 459 represented in bold text.

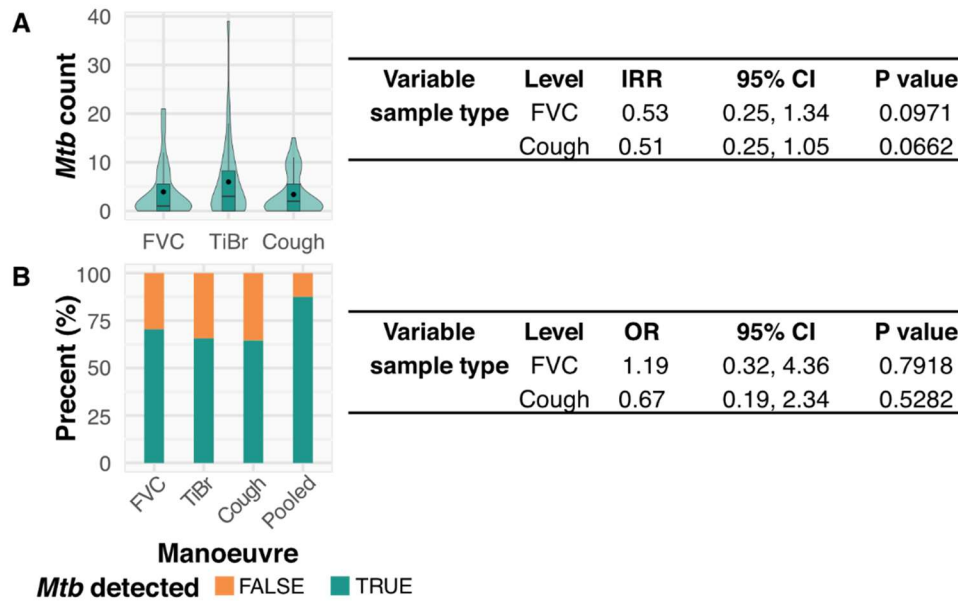

460 **Figure 4. The detection of putative *Mycobacterium tuberculosis* within each**  
 461 **respiratory manoeuvre sample. (A)** A comparison of the total number of  
 462 *Mycobacterium tuberculosis* (*Mtb*) detected between each sample, adjacent to the  
 463 results from a negative binomial regression. **(B)** A comparison of the proportion of  
 464 samples that were positive for aerosolised *Mtb*, adjacent to the results of a  
 465 generalized linear mixed model. The “pooled” variable in **(B)** represents the percent  
 466 of individuals that produced at least one positive sample.

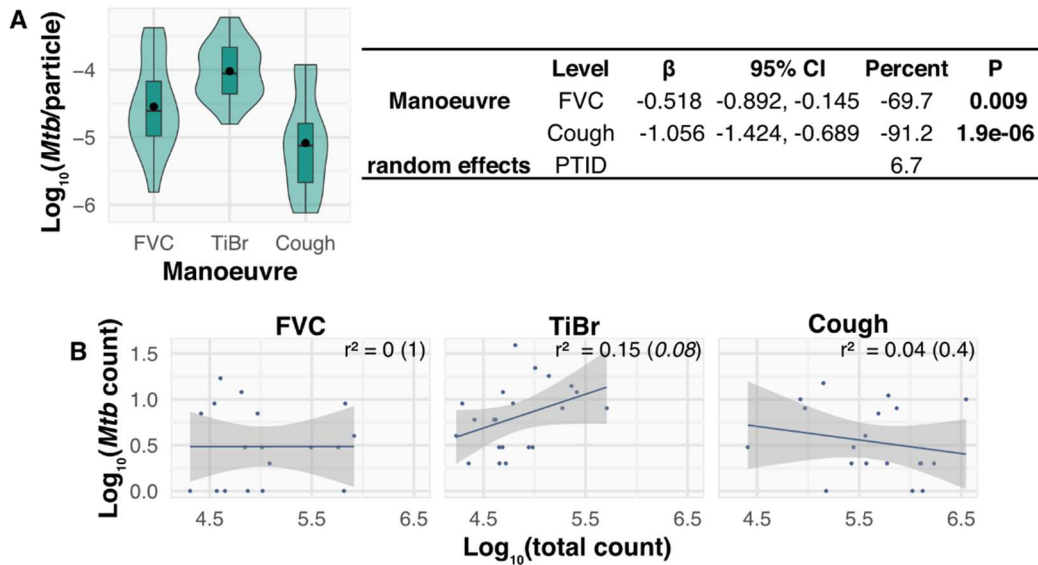

467 **Figure 5. The concentration of *Mycobacterium tuberculosis* relative to particle**  
468 **count for each respiratory manoeuvre. (A) A comparison of the average number**  
469 **of *Mycobacterium tuberculosis* (*Mtb*) per particle within the bioaerosol, adjacent to**  
470 **the results from a linear mixed model. (B) Correlation assessment between**  
471  **$\log_{10}(\text{count})$  and  $\log_{10}(\text{Mtb})$ , with the results of a Pearson's correlation ( $r$ -squared =  $r^2$**   
472 **and p-value in brackets).**

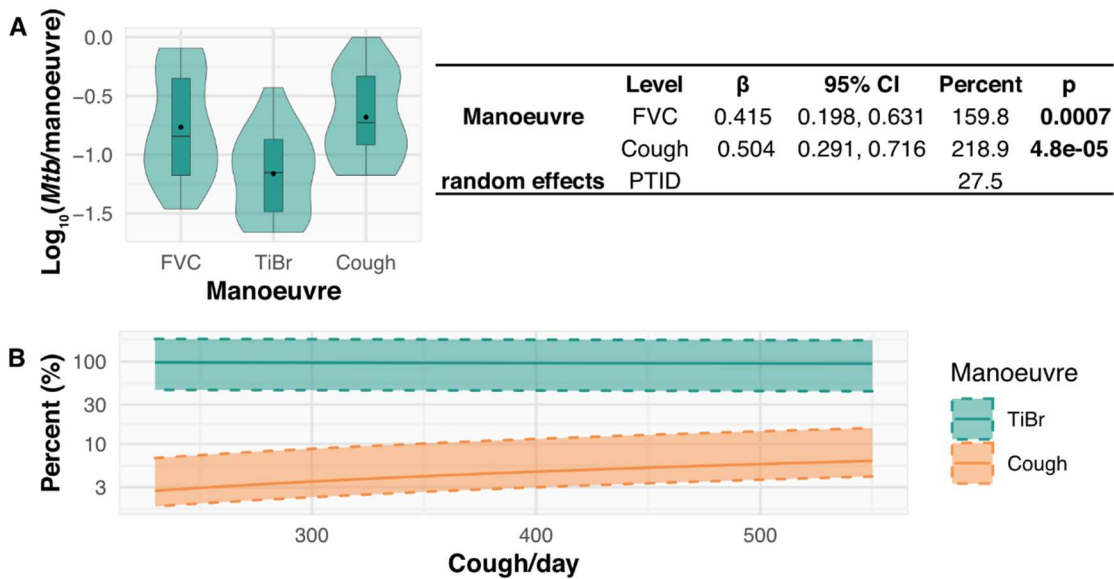

473 **Figure 6. The relative contribution of *Mycobacterium tuberculosis* by each**  
 474 **respiratory manoeuvre. (A)** A plot of the average number of *Mycobacterium*  
 475 *tuberculosis* (*Mtb*) per manoeuvre with the results of the linear mixed model. **(B)** The  
 476 relative contribution of bacteria per day (percent). We used the median frequency of  
 477 breaths to estimate an average of 22,047 breaths per day. We then assumed that for  
 478 every Cough, there would be one fewer breath throughout the day over a range of  
 479 coughs from 234 – 551 coughs. At each cough frequency, we determined the  
 480 average number of bacilli per TiBr (solid green line) or per Cough (solid orange line).  
 481 We then estimated the percentage contribution of aerosolised *Mtb* that each  
 482 manoeuvre made relative to the total (solid lines sum to 100). The shaded regions  
 483 represent the interquartile range of *Mtb* production for both TiBr and Cough.
